# Supplementary material
Source: PubMed Central journal article supplement (PMC4283407)

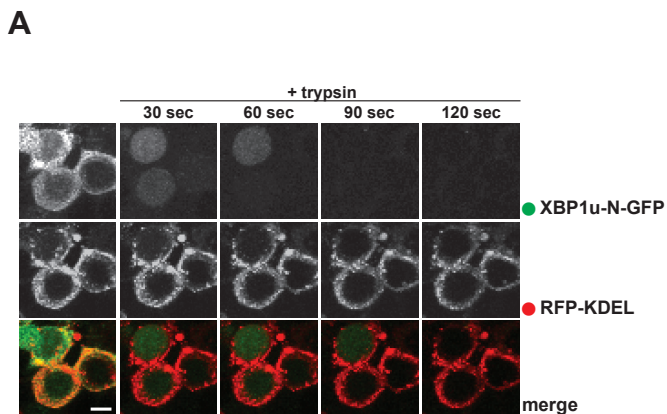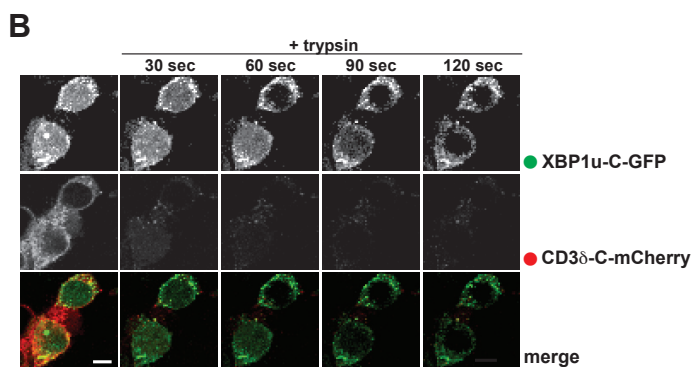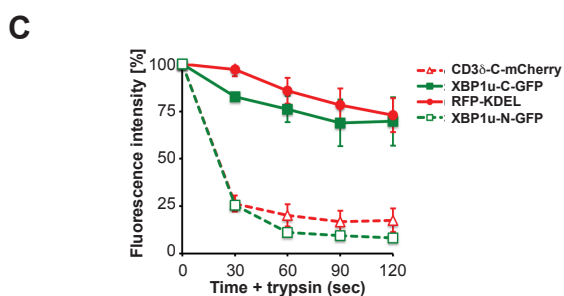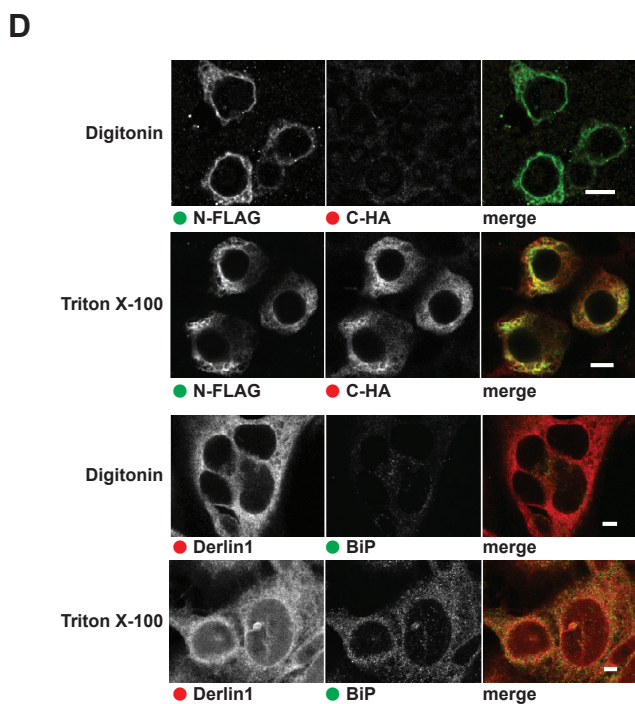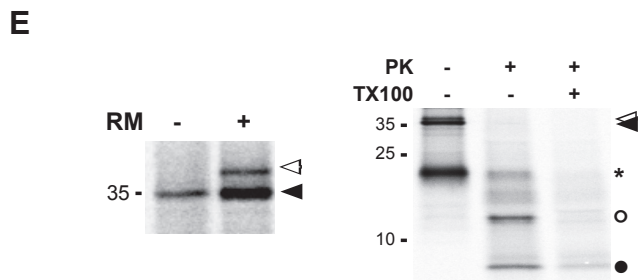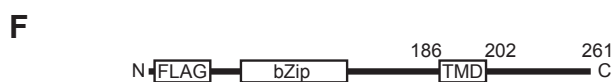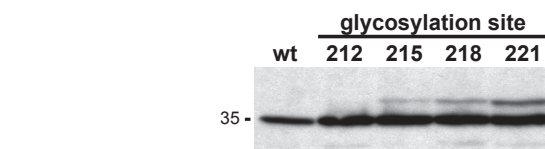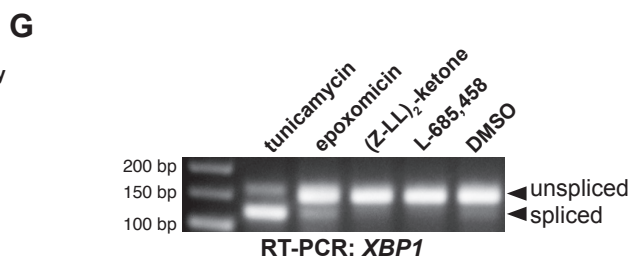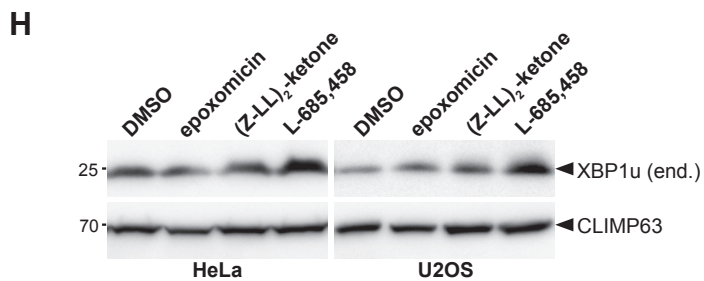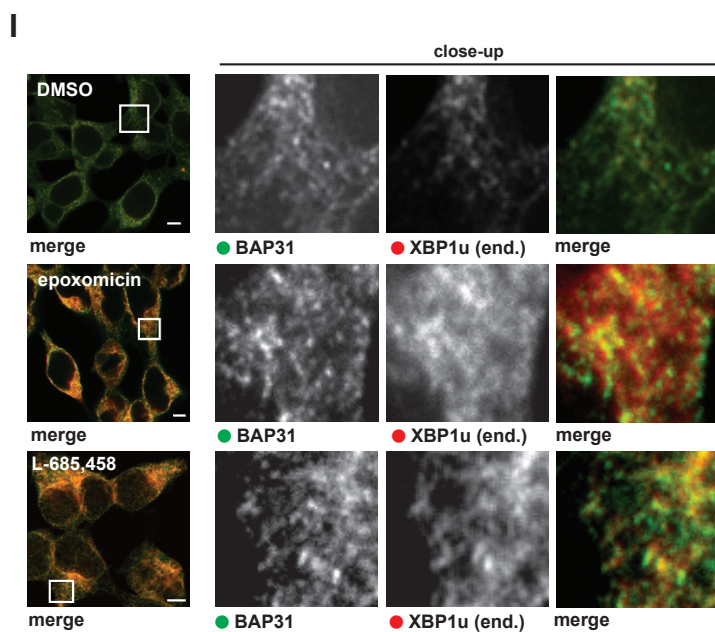

Supplement: embj0033-2492-sd10.pdf [file embj0033-2492-sd10.pdf]

Chen et al. Figure S3

A

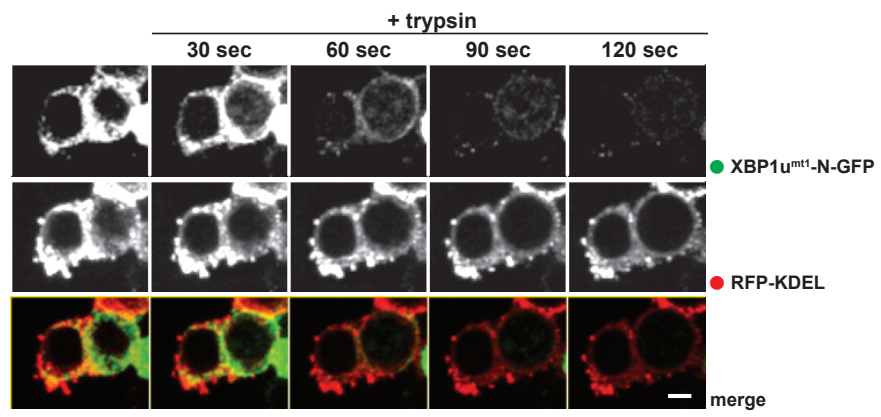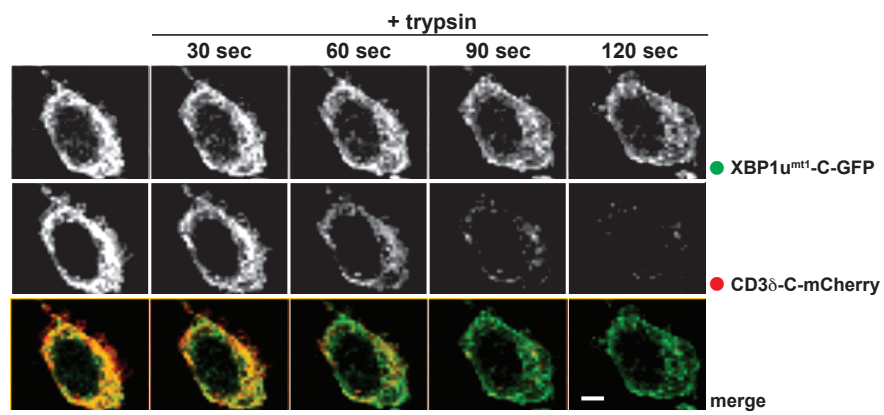

B

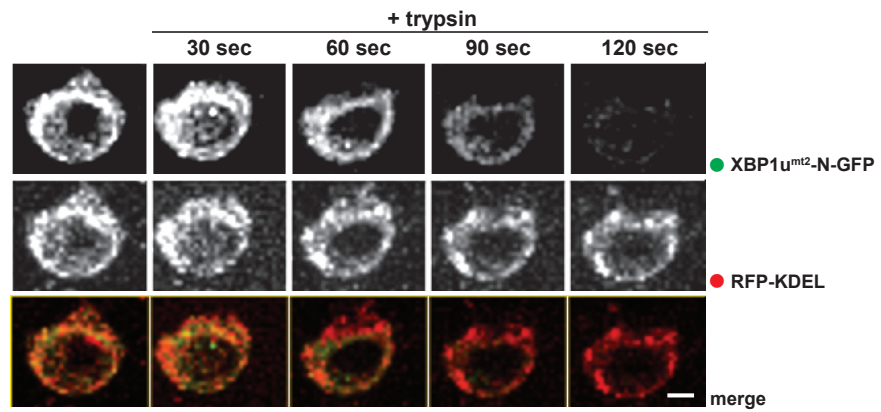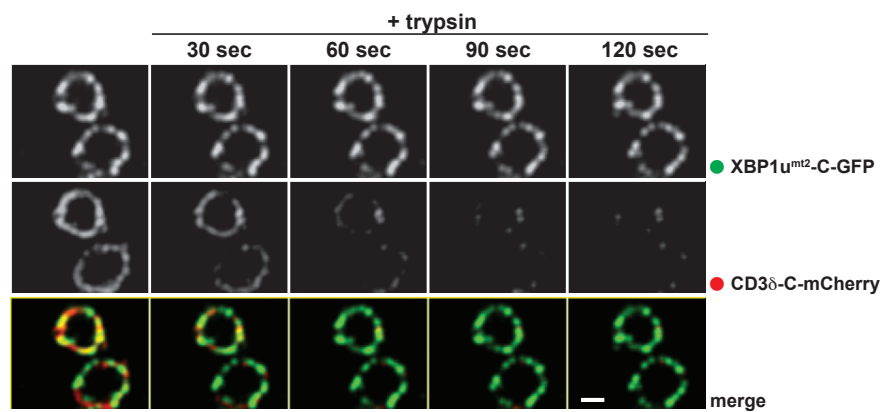

Supplement: embj0033-2492-sd11.pdf [file embj0033-2492-sd11.pdf]

# Chen et al. Figure S4

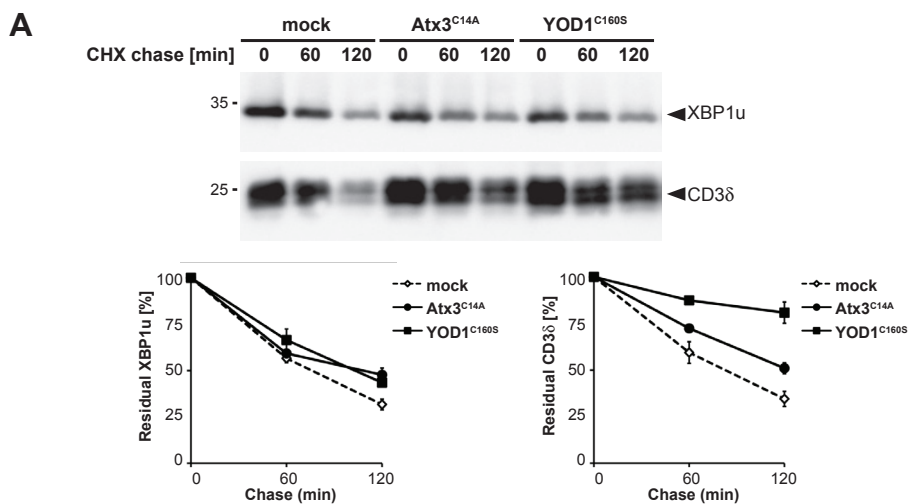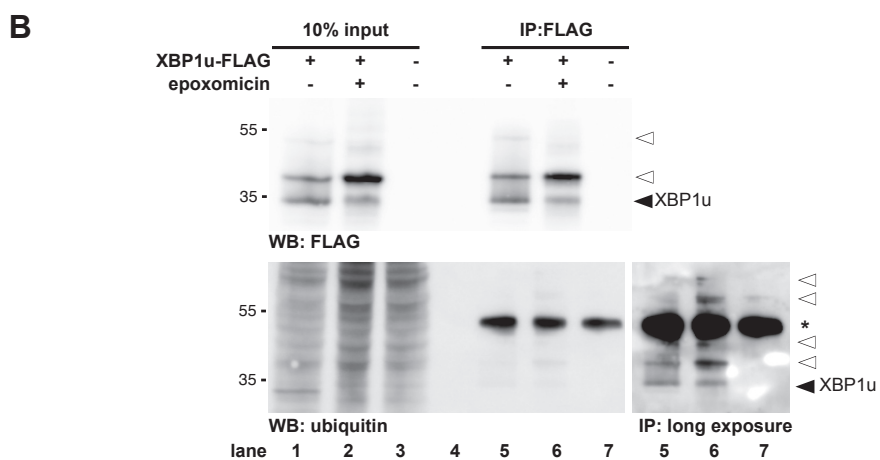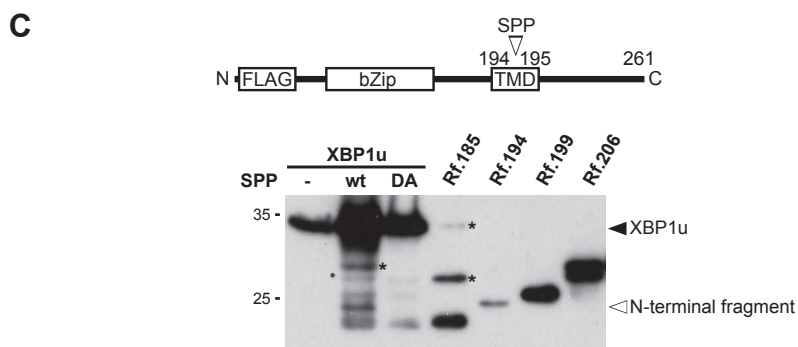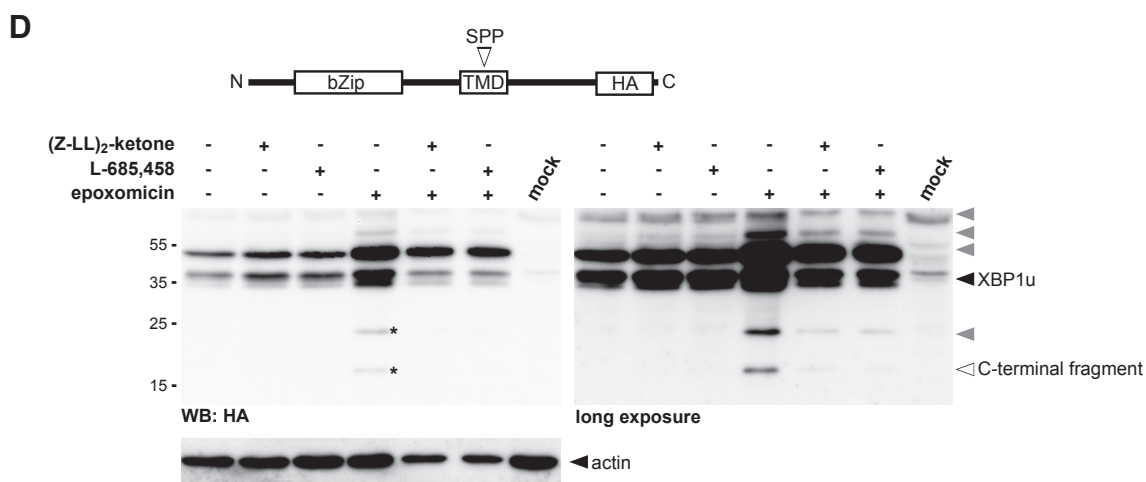

Supplement: embj0033-2492-sd12.pdf [file embj0033-2492-sd12.pdf]

**A**

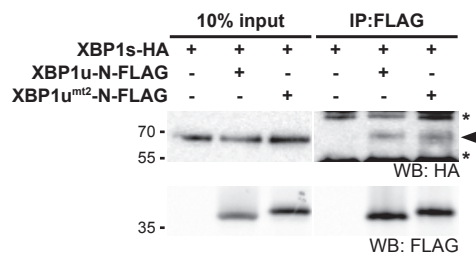

**B**

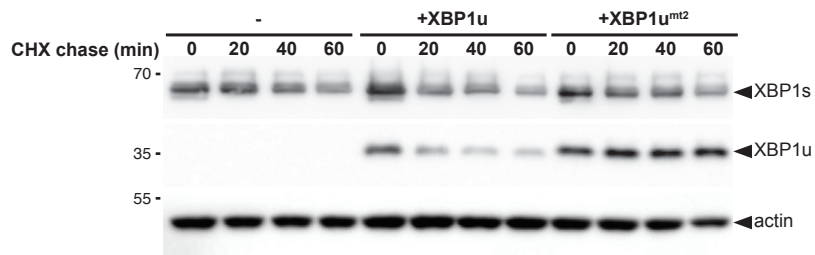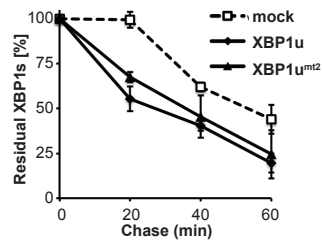

Supplement: embj0033-2492-sd13.pdf [file embj0033-2492-sd13.pdf]

**A**

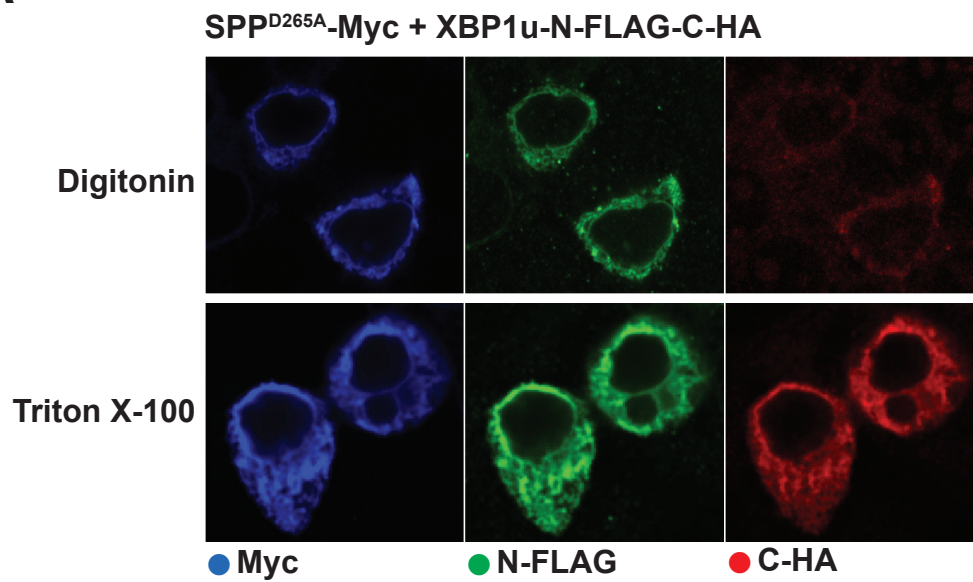

**B**

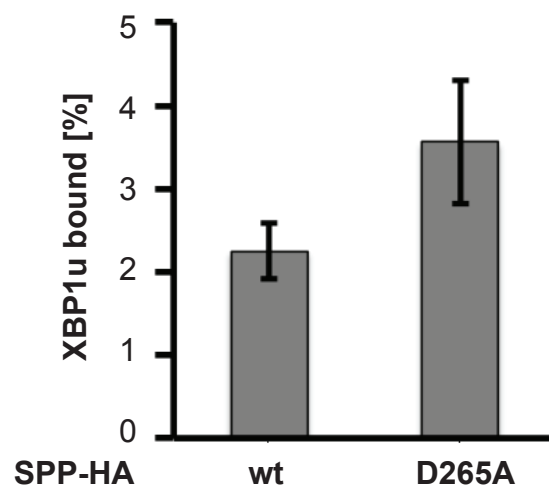

Supplement: embj0033-2492-sd14.pdf [file embj0033-2492-sd14.pdf]

**A**

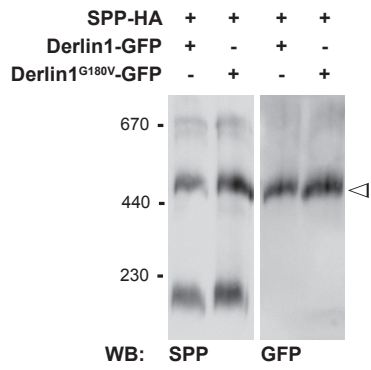

**B**

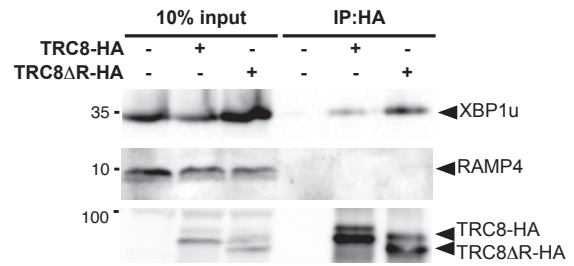

**C**

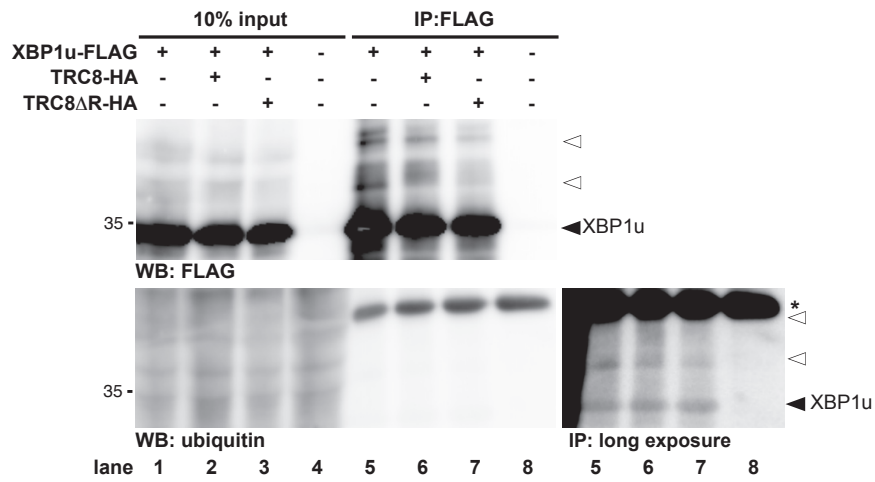

**D**

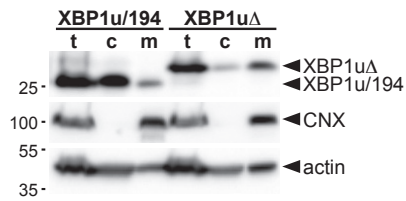

**F**

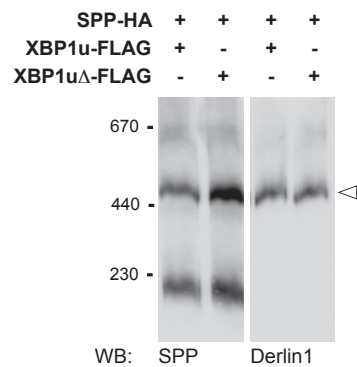

**E**

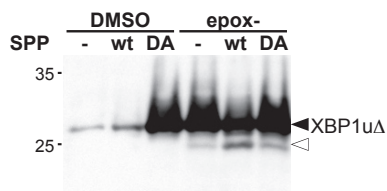

Supplement: embj0033-2492-sd15.pdf [file embj0033-2492-sd15.pdf]

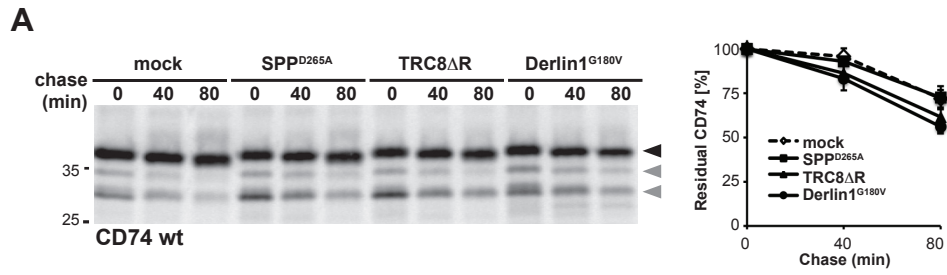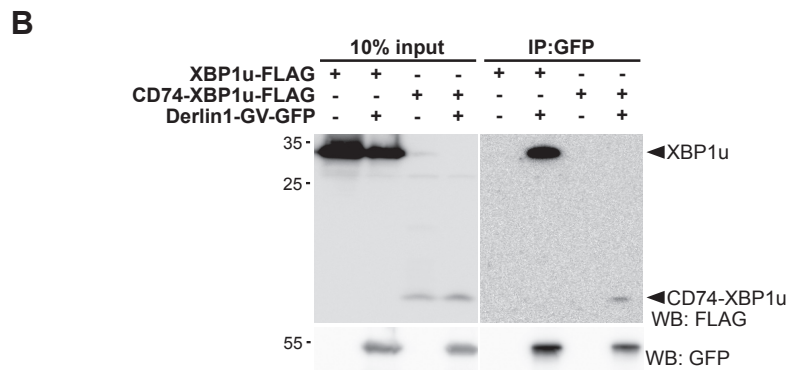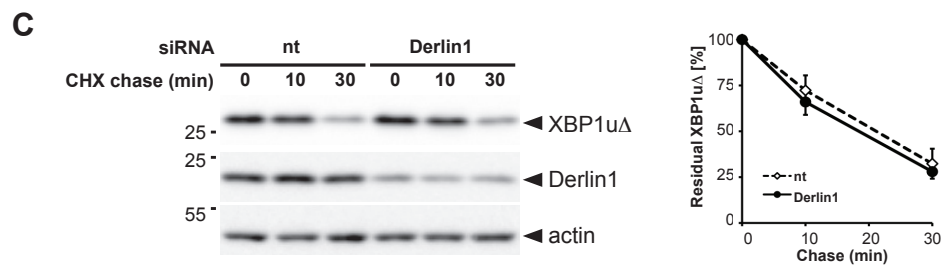

Supplement: embj0033-2492-sd16.pdf [file embj0033-2492-sd16.pdf]

# Chen et al. Source Data Figure S1

**A**

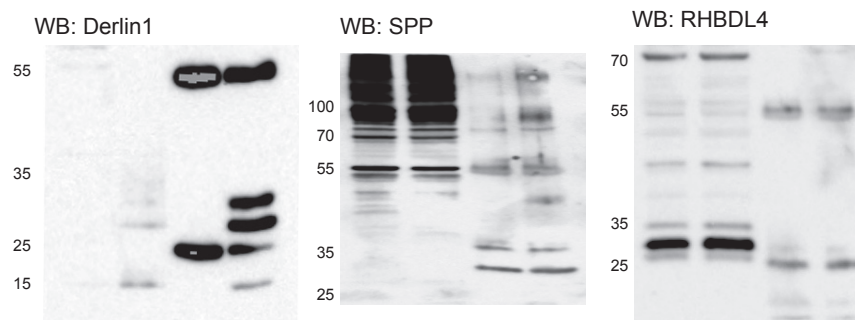

**B**

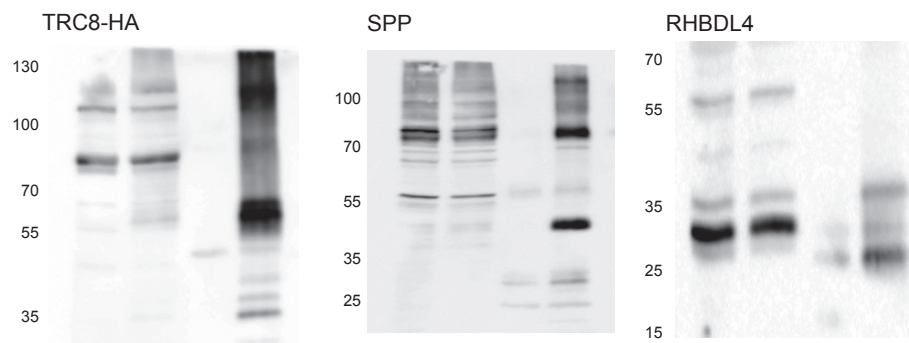

Supplement: embj0033-2492-sd18.pdf [file embj0033-2492-sd18.pdf]

# Chen et al. Source Data Figure S2

**E**

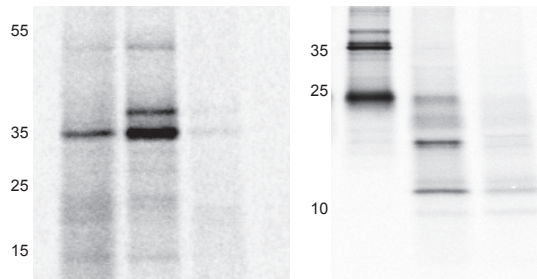

**F**

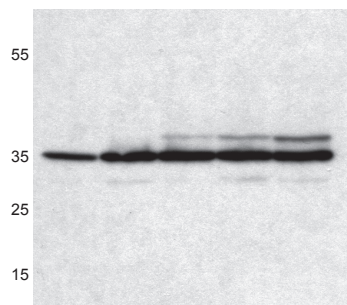

**G**

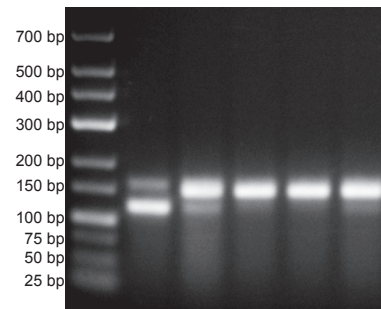

**H**

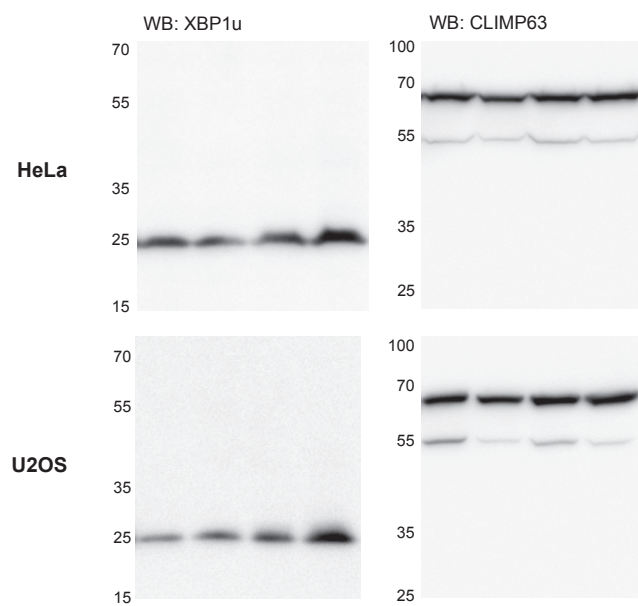

Supplement: embj0033-2492-sd19.pdf [file embj0033-2492-sd19.pdf]

# Chen et al. Source Data Figure 1

**A**

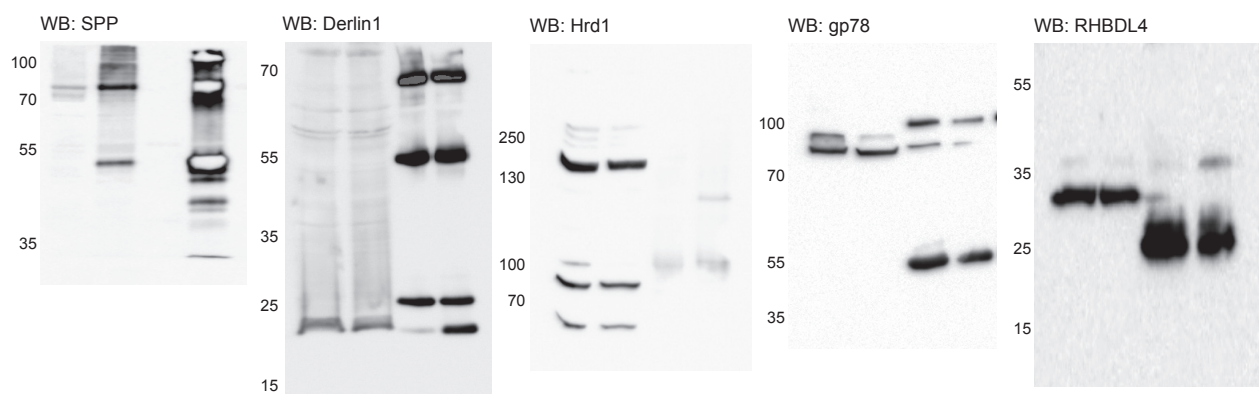

**B**

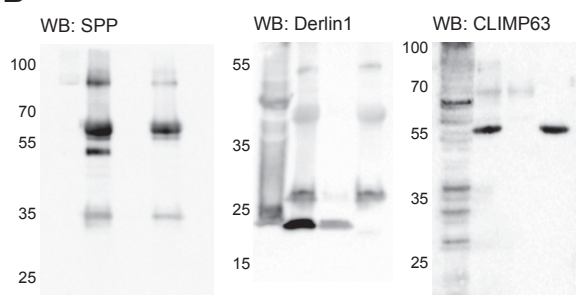

**C**

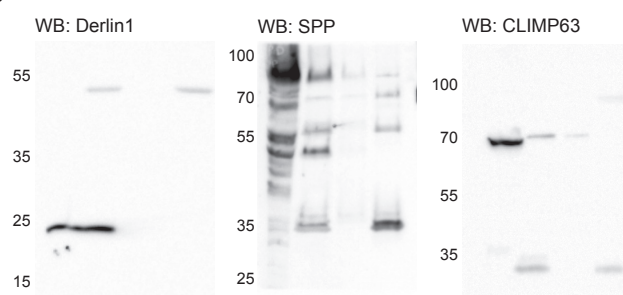

**D**

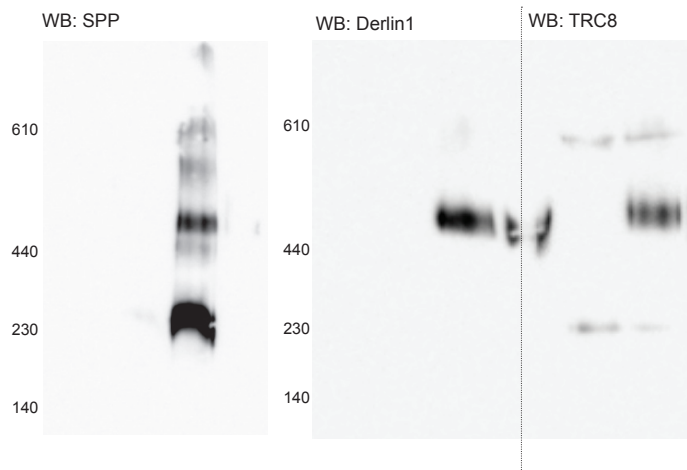

Supplement: embj0033-2492-sd2.pdf [file embj0033-2492-sd2.pdf]

# Chen et al. Source Data Figure S4

**A**

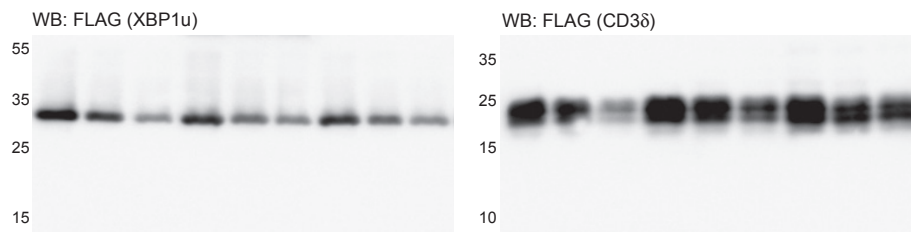

**B**

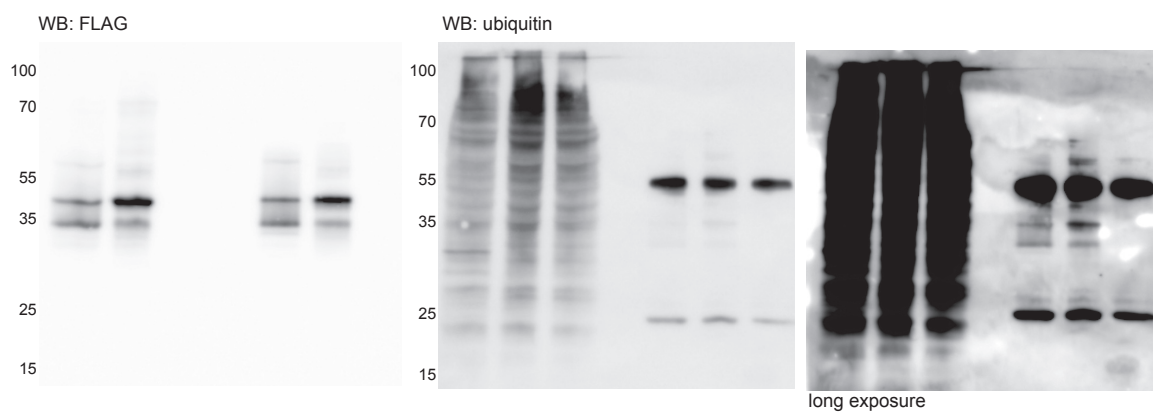

**C**

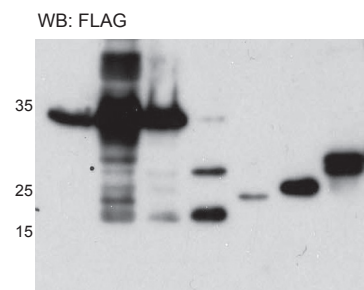

**D**

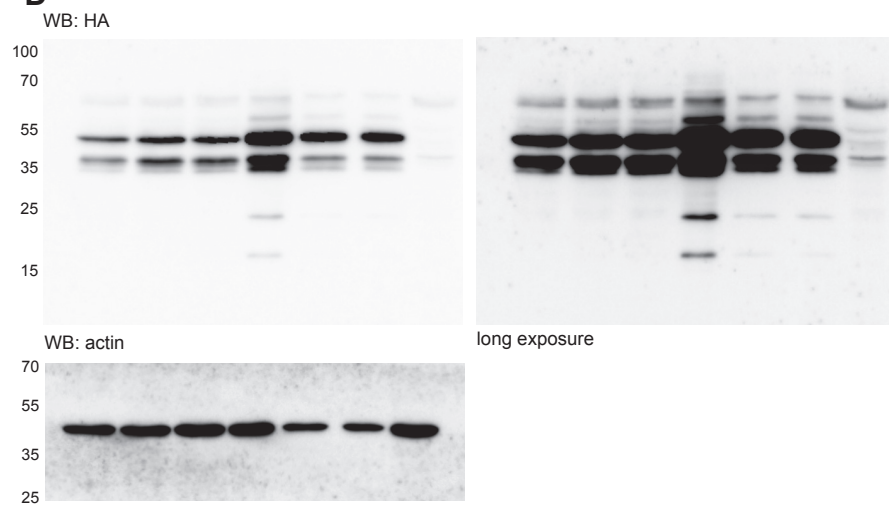

Supplement: embj0033-2492-sd20.pdf [file embj0033-2492-sd20.pdf]

# Chen et al. Source Data Figure S5

**A**

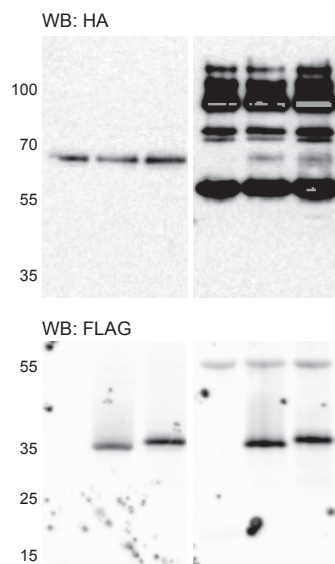

**B**

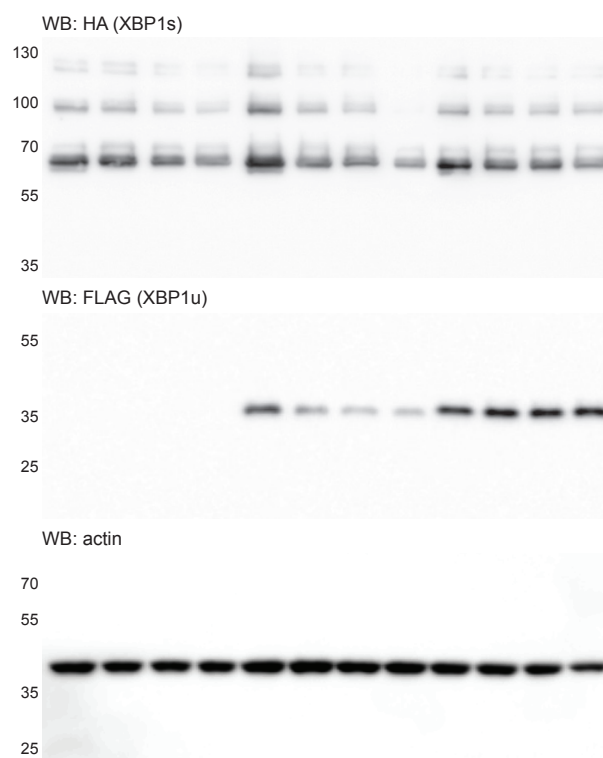

Supplement: embj0033-2492-sd21.pdf [file embj0033-2492-sd21.pdf]

# Chen et al. Source Data Figure S7

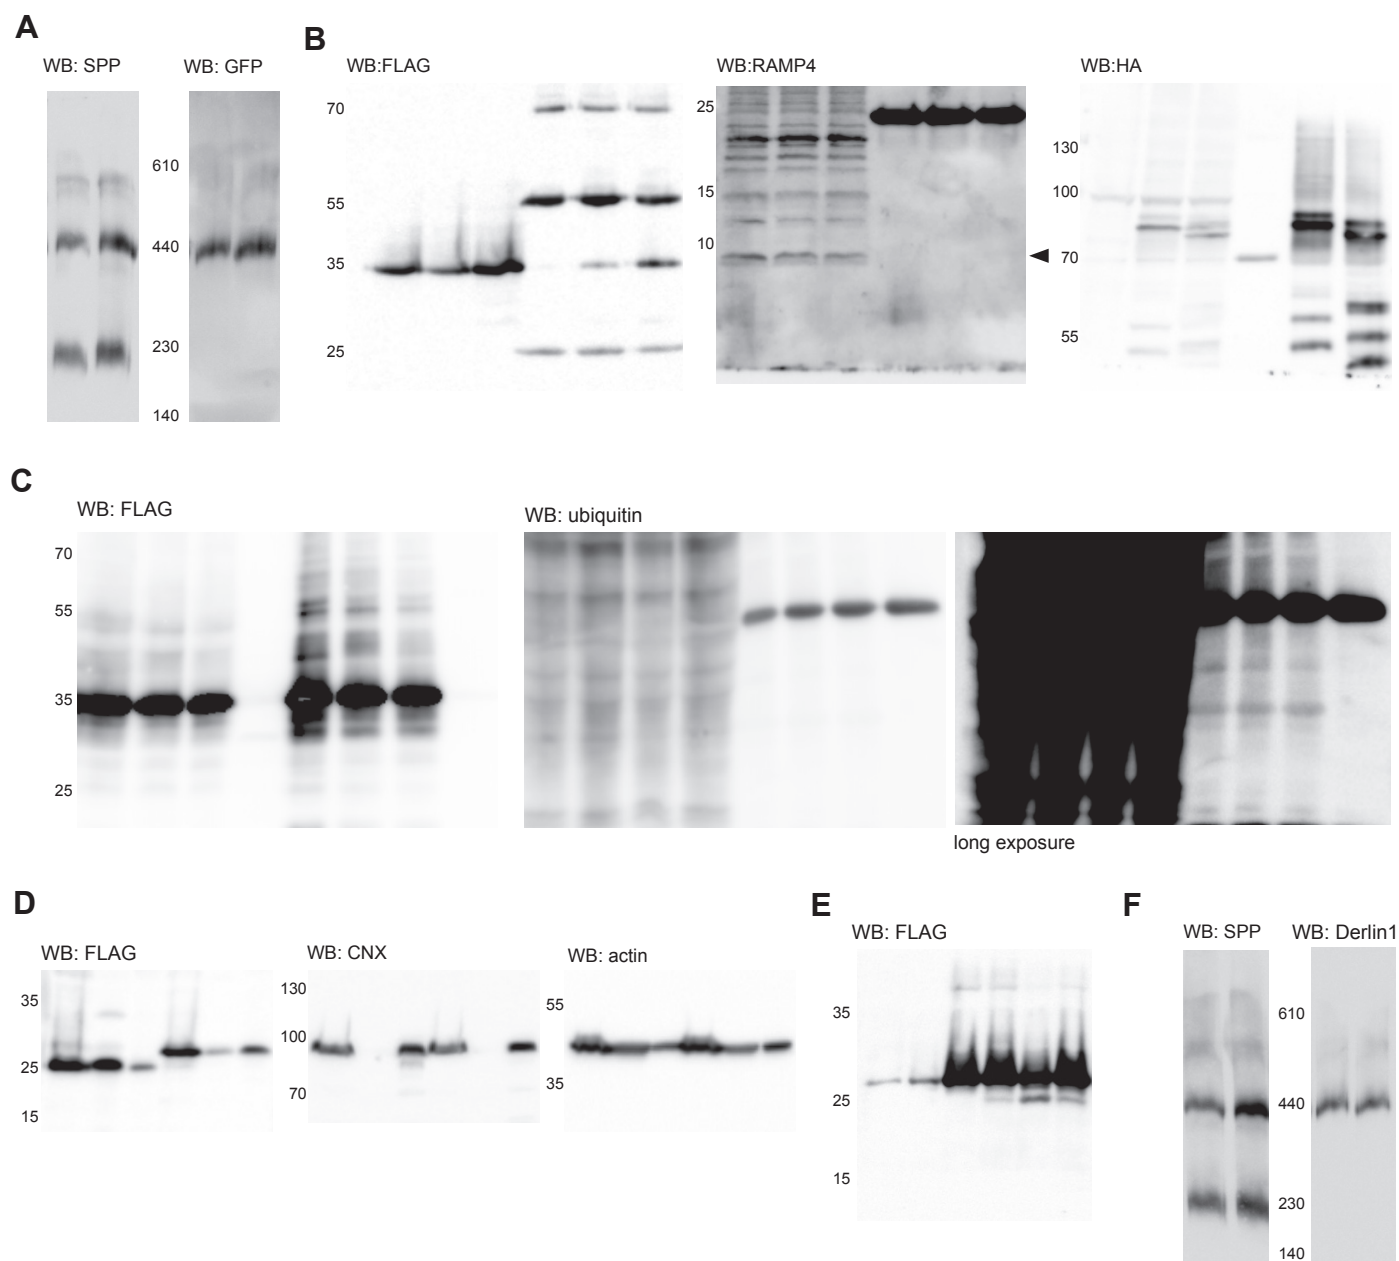

Supplement: embj0033-2492-sd22.pdf [file embj0033-2492-sd22.pdf]

Chen et al. Source Data Figure S8

**A**

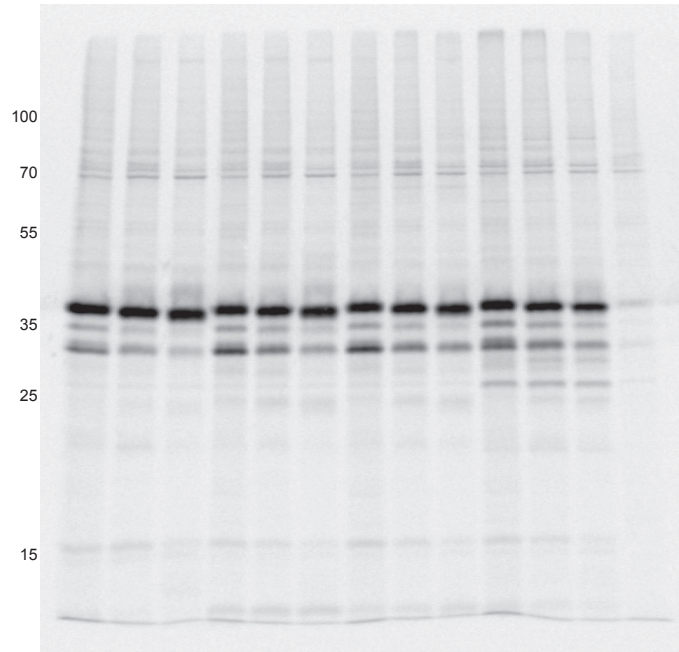

**B**

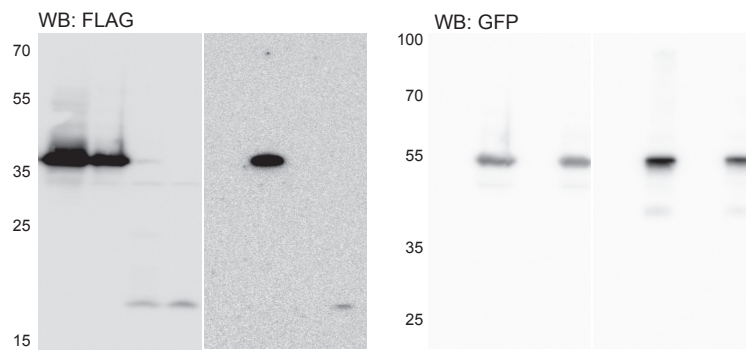

**C**

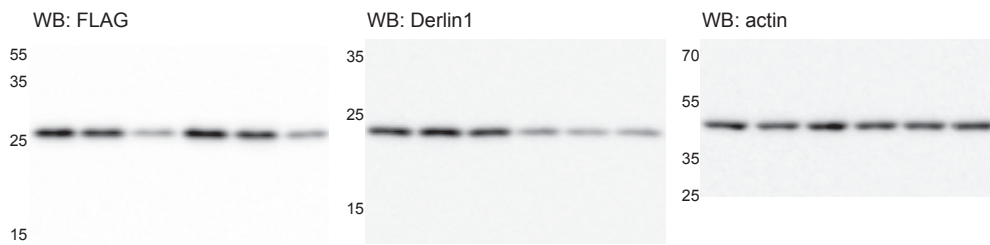

Supplement: embj0033-2492-sd23.pdf [file embj0033-2492-sd23.pdf]

# Chen et al. Source Data Figure 2

**C**

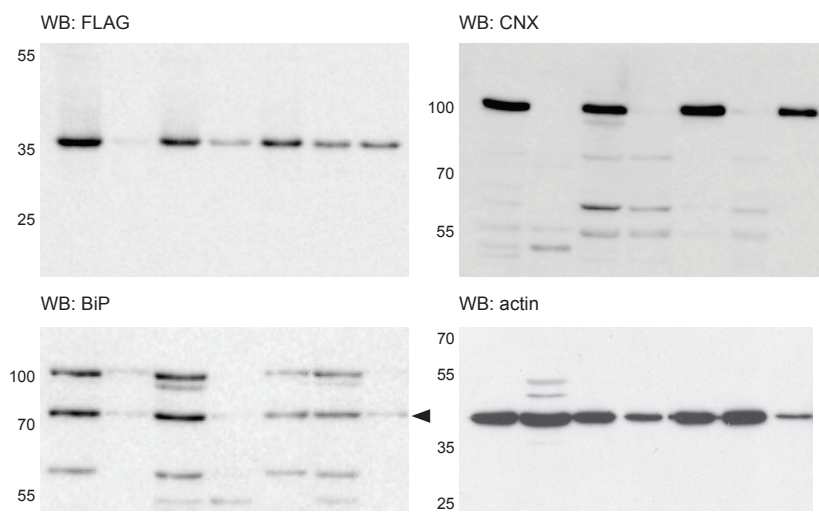

**D**

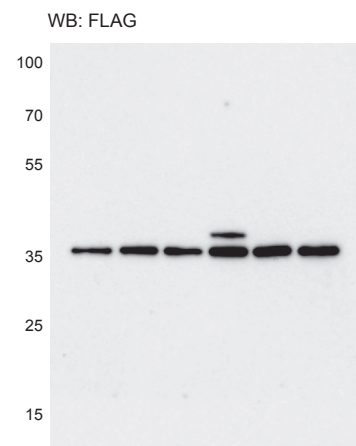

**F**

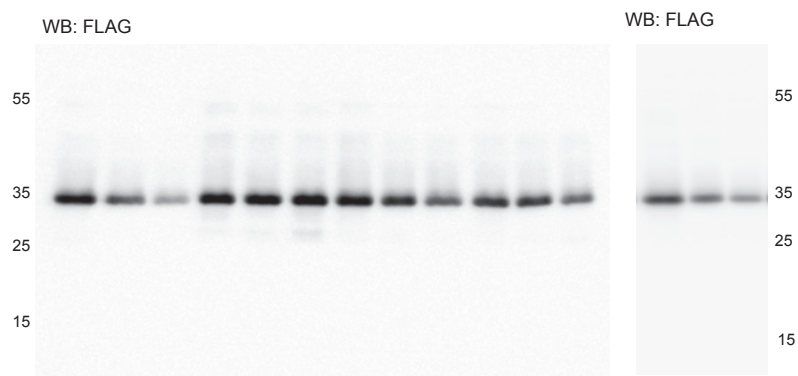

**G**

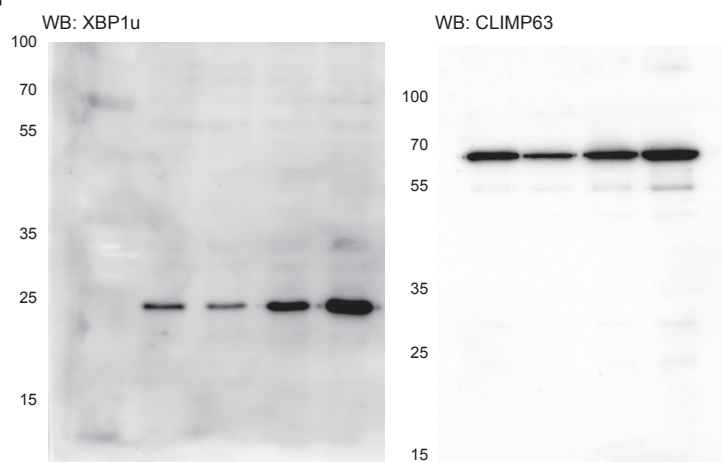

Supplement: embj0033-2492-sd3.pdf [file embj0033-2492-sd3.pdf]

# Chen et al. Source Data Figure 3A

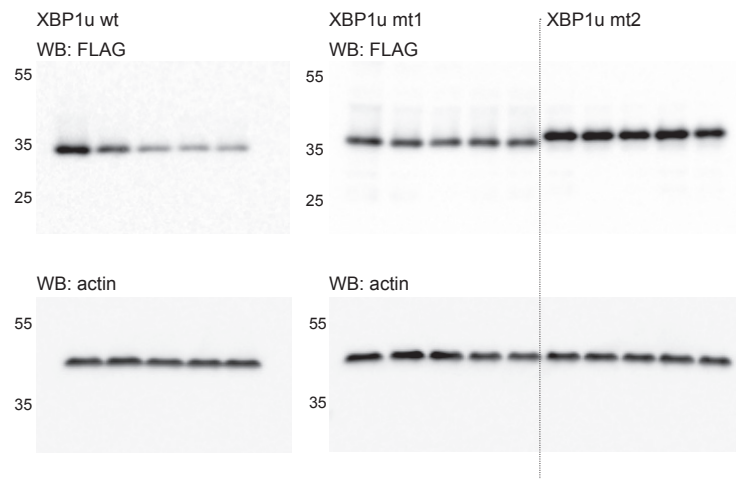

Supplement: embj0033-2492-sd4.pdf [file embj0033-2492-sd4.pdf]

# Chen et al. Source Data Figure 4

**A**

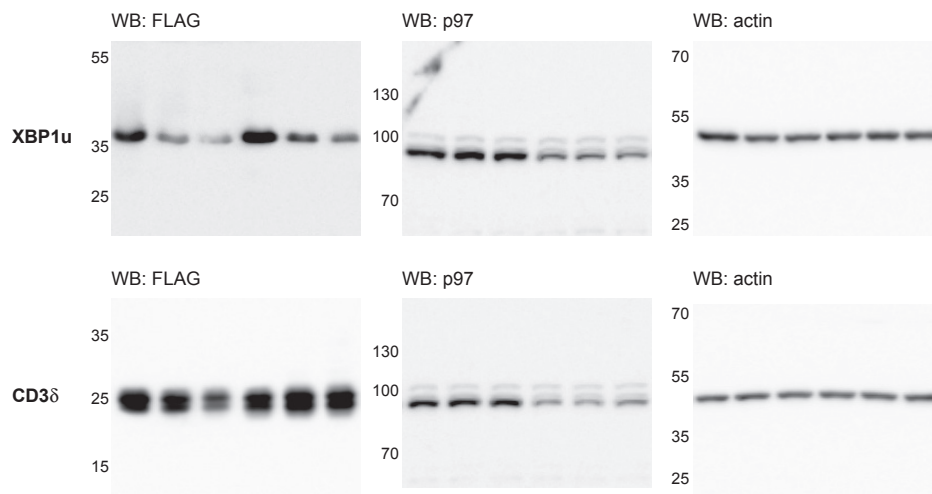

**C**

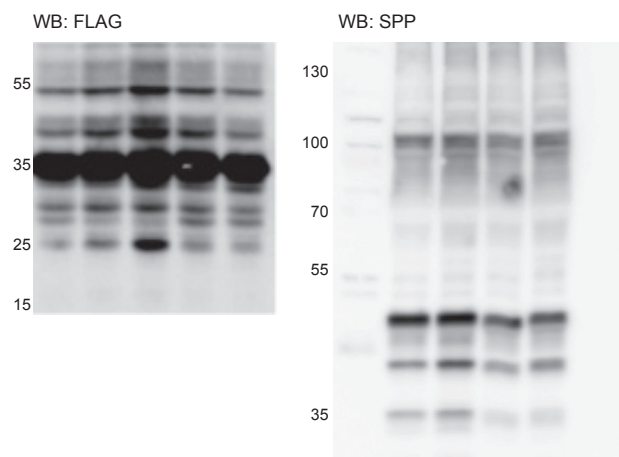

Supplement: embj0033-2492-sd5.pdf [file embj0033-2492-sd5.pdf]

# Chen et al. Source Data Figure 6

**A**

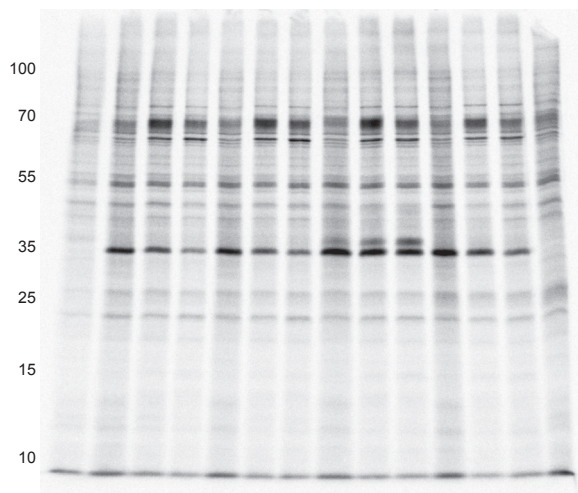

**B**

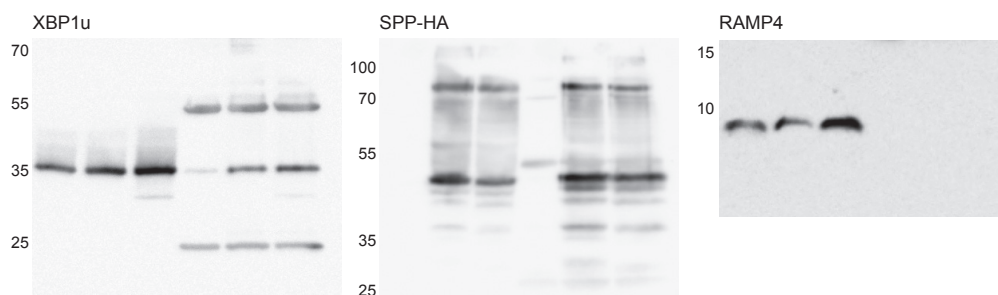

**C**

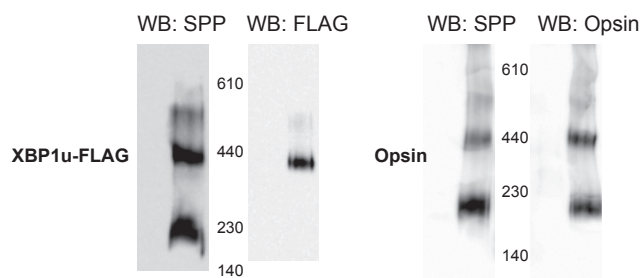

Supplement: embj0033-2492-sd6.pdf [file embj0033-2492-sd6.pdf]

# Chen et al. Source Data Figure 7

**A**

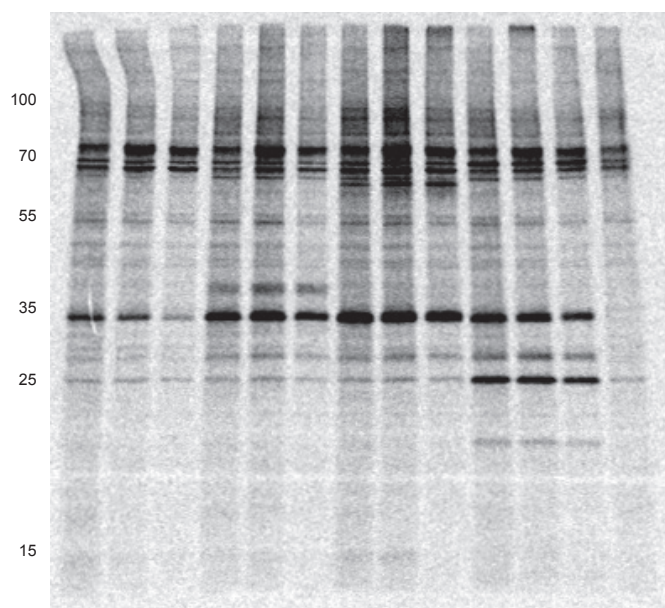

**B**

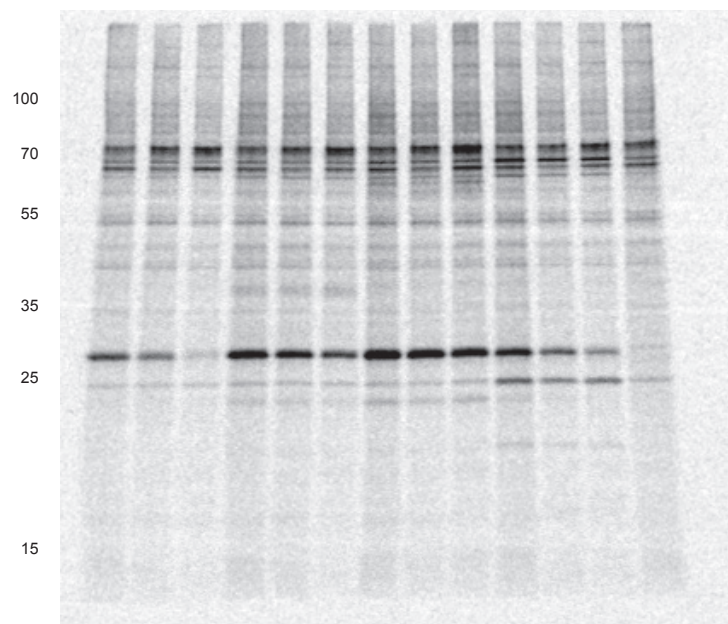

**C**

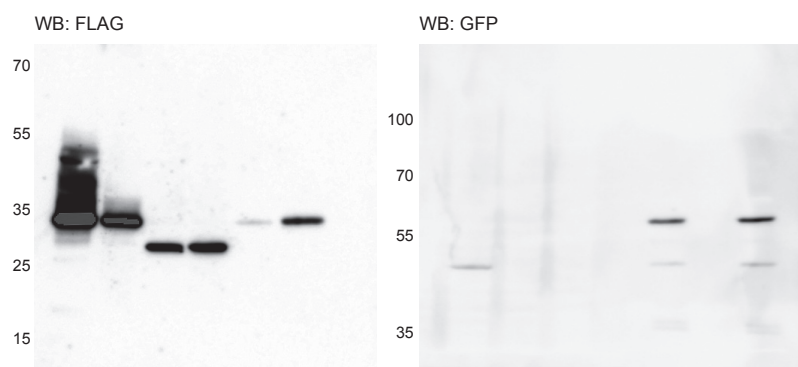

Supplement: embj0033-2492-sd7.pdf [file embj0033-2492-sd7.pdf]

# Chen et al. Source Data Figure 8

**B**

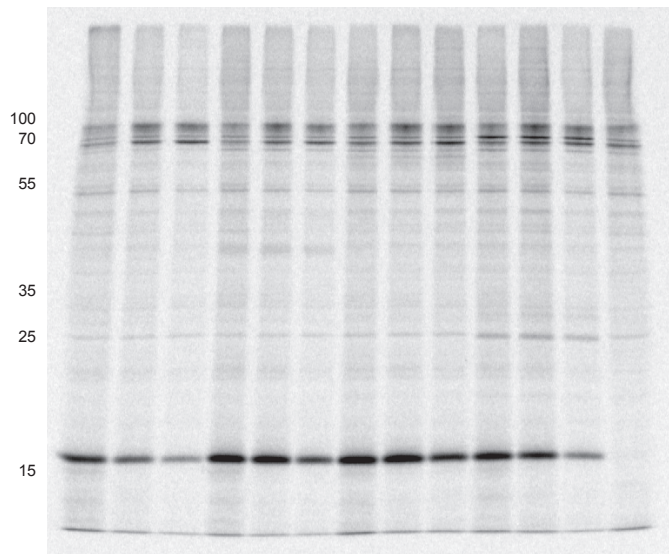

**C**

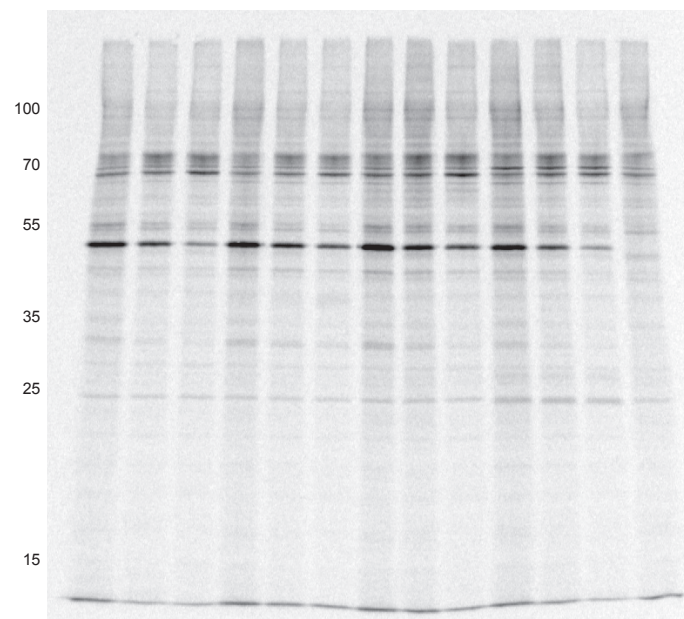

**D**

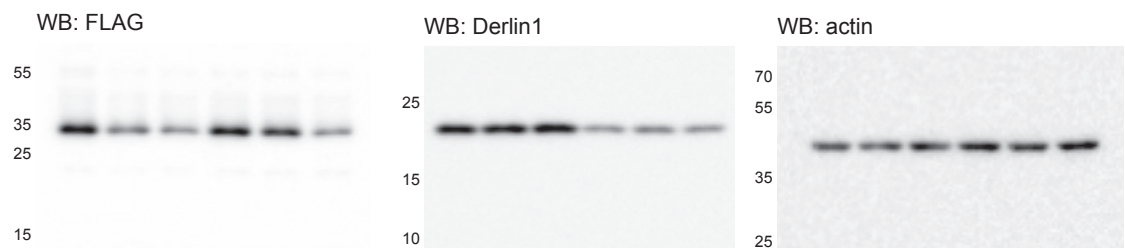

Supplement: embj0033-2492-sd8.pdf [file embj0033-2492-sd8.pdf]

# Chen et al. Figure S1

## A

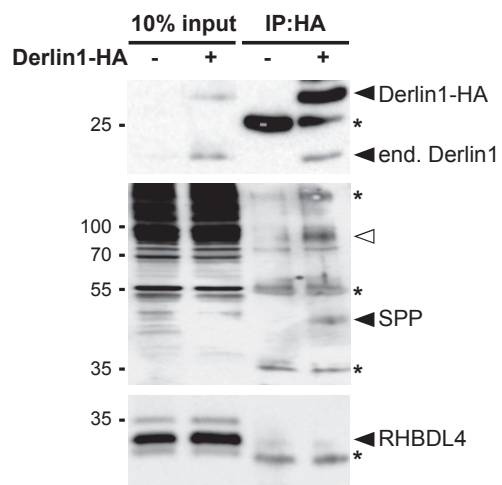

## B

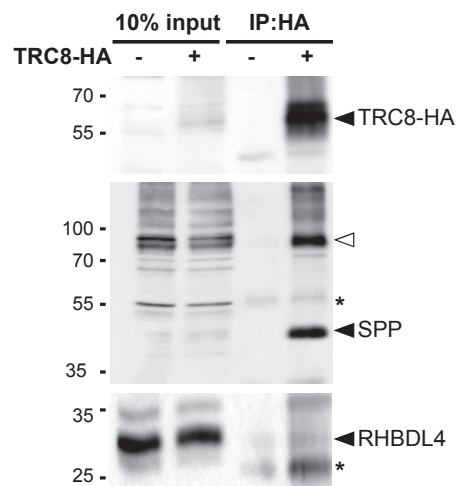

Supplement: embj0033-2492-sd9.pdf [file embj0033-2492-sd9.pdf]
